# Supplementary material
Source: MDPI journal article supplement (https://www.mdpi.com/1999-4907/13/12/1990)
Supplement: s1 [file s1]

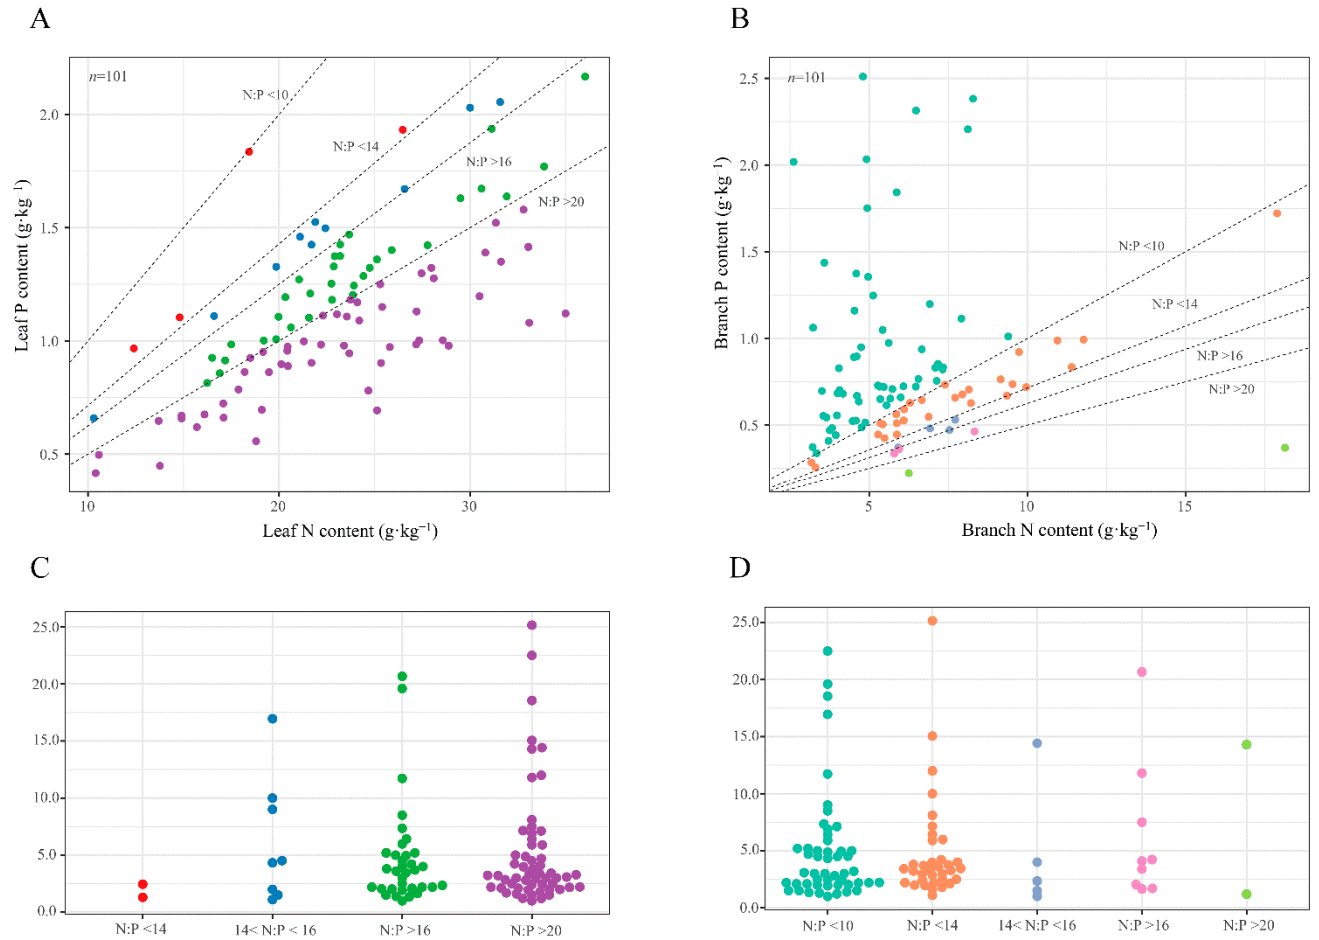

**Figure S1.** Leaf and branch N:P ratio (A,B) and DBH distribution (C,D).

**Table S1.** Principal component analyses of soil properties.

|     | PC1      | PC2      | PC3      | PC4      | PC5      | PC6      | PC7      | PC8      |
|-----|----------|----------|----------|----------|----------|----------|----------|----------|
| pH  | 0.733857 | 0.31975  | 0.580889 | 0.042137 | 0.131711 | 0.044299 | 0.026326 | -0.00152 |
| SAN | 0.923326 | -0.28661 | -0.06489 | -0.17682 | 0.069357 | 0.087574 | -0.12951 | 0.024382 |
| SAP | 0.691328 | -0.54543 | 0.164121 | 0.435573 | -0.08748 | 0.015683 | 0.003986 | 0.001025 |
| SAK | 0.966658 | 0.004558 | -0.06549 | 0.022984 | 0.068493 | -0.23486 | -0.02936 | -0.00463 |
| SN  | 0.964627 | -0.13646 | -0.05406 | -0.19818 | -0.04248 | 0.048002 | 0.019671 | -0.06465 |
| SP  | 0.848231 | 0.460093 | 0.106297 | -0.07752 | -0.22435 | -0.01078 | -0.0267  | 0.018666 |
| SK  | 0.693608 | 0.47454  | -0.42906 | 0.315923 | 0.065728 | 0.073915 | -0.00191 | -0.00535 |
| SOM | 0.941172 | -0.1967  | -0.16677 | -0.16278 | 0.02047  | 0.01529  | 0.13907  | 0.034643 |
